## Review

## A critical evaluation of the trigger point phenomenon

John L. Quintner<sup>1</sup>, Geoffrey M. Bove<sup>2</sup> and Milton L. Cohen<sup>3</sup>

## Abstract

The theory of myofascial pain syndrome (MPS) caused by trigger points (TrPs) seeks to explain the phenomena of muscle pain and tenderness in the absence of evidence for local nociception. Although it lacks external validity, many practitioners have uncritically accepted the diagnosis of MPS and its system of treatment. Furthermore, rheumatologists have implicated TrPs in the pathogenesis of chronic widespread pain (FM syndrome). We have critically examined the evidence for the existence of myofascial TrPs as putative pathological entities and for the vicious cycles that are said to maintain them. We find that both are inventions that have no scientific basis, whether from experimental approaches that interrogate the suspect tissue or empirical approaches that assess the outcome of treatments predicated on presumed pathology. Therefore, the theory of MPS caused by TrPs has been refuted. This is not to deny the existence of the clinical phenomena themselves, for which scientifically sound and logically plausible explanations based on known neurophysiological phenomena can be advanced.

**Key words:** nerve, muscle, referred pain, pain mechanisms, philosophy of science.

## Rheumatology key messages

- The theory of myofascial pain based on trigger points is conjecture that has been put forward as established knowledge.
- The key phenomenon of muscle tenderness demands a robust plausible explanation based on neurobiology.
- Clinicians cannot ignore the important role of contextual factors when evaluating outcomes of their treatment for myofascial pain syndrome.

## Introduction

The phenomena of muscle pain and tenderness in the absence of obvious disease are well recognized but poorly understood. Myofascial pain syndrome (MPS) is a popular explanatory model, which posits a local (muscle) origin of nociception called the trigger point (TrP) and advocates local treatment, primarily direct manipulation of TrPs using manual pressure or needles, the latter with and without injectate [1, 2]. These forms of treatment are being practised worldwide by physicians, physical therapists, chiropractors and various unlicensed and unregulated practitioners [3].

But does the evidence support these concepts? Are the hypotheses generated by MPS theory scientifically

sound? And are treatments based on this theoretical model beneficial?

This article will show that the theory is flawed both in reasoning and in science. In seeking a resolution, two testable hypotheses are identified that point the way to neuroscientific explanations for the observed clinical phenomena.

## Evolution of MPS theory

It has long been believed that muscle pain might originate from focal lesions within connective tissues [4, 5]. The initial description put forward by Stockman [6] was of fibrositic nodules, which were suggested to harbour low-grade inflammation that activated sensory fibres innervating muscle spindles and the interstitial tissues between muscle fibres. However, Stockman's claim that 'the essential lesion is a chronic inflammatory hyperplasia of white fibrous tissue in patches' [7] has never been confirmed [8].

An infective aetiology of such nodules was proposed, but other conjectures included microtrauma, exposure to environmental extremes, nerve root irritation and psychoneurosis [8, 9].

<sup>1</sup>Rheumatology and Pain Medicine, Mount Claremont, Perth, Western Australia, <sup>2</sup>University of New England, College of Osteopathic Medicine, Biddeford, Maine, USA and <sup>3</sup>Pain Medicine and Rheumatology, St Vincent's Clinical School, University of New South Wales Australia, Sydney, New South Wales, Australia

Submitted 7 August 2014; revised version accepted 23 October 2014.

Correspondence to: John L. Quintner, Rheumatology and Pain Medicine, Mount Claremont, 28 Bentley Close, WA 6010, Australia. E-mail: jqu33431@bigpond.net.au

Kraus (cited by Simons [2]) speculated that palpable muscle hardening of unknown cause could set up a reflex increase in muscle tension, resulting in a pain-reflex-pain self-perpetuating cycle that could be disrupted by ethyl chloride sprayed onto the overlying skin or by local injections of anaesthetic. Pain theorists William Livingstone [10] and John Bonica [11] favoured this vicious circle hypothesis, as did others [12, 13].

Speculation took a new turn when Travell and Rinzler [5] conceptualized that pain felt in voluntary muscles is myofascial in origin. Their claim, that 'trigger areas in myofascial structures can maintain pain cycles indefinitely' [5], was reminiscent of the vicious circle hypothesis.

Travell and Simons formalized the construct of 'myofascial pain arising from trigger points' [14]. Not only were TrPs described in exactly the same way as fibrositic nodules had been, but it was also asserted that they could potentially develop within every voluntary muscle and in multiple locations within a given muscle.

The theory of MPS comprised two essential components: the TrP, a localized area of tenderness or hyperirritability deep within voluntary muscle; and a predictable discrete zone of deep aching pain, which could be located in the immediate region of or remote from the TrP, and which was worsened by palpation of the TrP [4, 14].

Travell and Simons [14] composed anatomical charts of TrPs and their characteristic pain referral patterns. However, it appears that their diagrams had 'sometimes been chosen arbitrarily, there being no accepted standard' [15].

Located within palpable taut bands, TrPs were said to represent shortened (contractured [16]) muscle fibres. On snapping palpation or insertion of a needle, a local twitch response could be elicited, which was accompanied by an irritable EMG response [14]. In contrast to a normal muscle, one containing a TrP was said to exhibit both antalgic inhibition when tested for its strength, and intolerance to passive stretch.

To explain the puzzling onset of pain in ostensibly lesion-free tissues, Travell and Simons [14] found it necessary to invent the latent TrP, a site of potential tenderness within a muscle unassociated with spontaneous pain but having the potential to be activated by a myriad of factors, within or outside the body. In an attempt to extend the theory to explain more widespread pain, they claimed that TrPs could self-propagate to become secondary TrPs in other muscles and even to metastasize throughout the bodily musculature.

The recent conjecture that peripheral pain generators can reside within muscles (i.e. myofascial tissues), and be responsible not only for spontaneous pain but also for the initiation and maintenance of profound changes within the CNS (known as central sensitization) rests upon these dubious premises [17, 18]. Similarly, prominent rheumatologists are among those who maintain that TrPs are responsible for the initiation and maintenance of the syndrome of chronic widespread pain (FM) [17-23].

Beliefs in TrP theory and the associated concept of MPS continue to be strongly held [24], despite the fact

that such beliefs exemplify circular reasoning: TrPs cause myofascial pain because painful muscles contain them [25].

## Review of the evidence

### Clinical diagnosis

An extensive review identified at least 19 different sets of diagnostic criteria used for the MPS/TrP syndrome, and concluded there was a lack of consistency and consensus on case definition [26]. The authors suggested that until reliable diagnostic criteria had been established, 'there is a need for greater transparency in research papers on how a case of MTrP [*sic*] pain syndrome is defined, and claims for effective interventions in treating the condition should be viewed with caution' [26]. A similar study found that the diagnosis of MPS from putative TrPs was based on a clinical test of unknown reliability and validity with no accepted reference standard [27].

In studies of inter-examiner reliability, examiners were given the muscle to palpate with or without an accompanying diagnosis [28-31]. In one study, extensive training coupled with the use of an algometer resulted in examiner agreement that the phenomenon could be localized [29]. Another study reported that the assessments of an individual examiner were consistent from one test to another [31], and that more experience in assessment leads to better inter-examiner agreement [30]. These studies suggest that when shown where a problem may exist, examiners may agree. However, when blinded as to diagnosis, those who claimed expertise in the field were unable to detect putative TrPs in the majority of subjects with a MPS diagnosis [32]. In this study, there was virtually no inter-examiner reliability for either putative TrPs or taut bands. This finding questions the reliability of the diagnostic criteria used by these experts. More recent studies [33, 34] have also reported poor inter-examiner diagnostic reliability and poor methodological quality [35].

In summary, physical examination cannot be relied upon to diagnose a condition that is supposed to be defined by that physical examination. That is, the pathognomonic criterion for making the diagnosis of MPS is unreliable.

### Pathology

The first histological analysis of fibrositic nodules reported diffuse inflammatory changes [9]. These findings were not confirmed, although tender muscles contained increased extracellular fluid [36]. The authors suggested that the resulting turgor might explain the observed finding of mechanical tenderness.

The term myogelosis describes a change in muscle structure analogous to TrPs [37]. Samples taken from unfixed cadavers following detection of such areas showed altered histology [37], but the clinical relevance to the findings on palpation is unknown.

### Tissue biochemistry

Shah *et al.* [38, 39] employed microdialysis to sample tissue fluid within and near to a palpated trigger zone in trapezius muscles in patients with a diagnosis of TrPs and also in normal pain-free subjects. Samples were taken from the following regions: normal (no pain, no TrP), active (pain and TrP detected) and latent (no pain, TrP detected). Samples were also taken from asymptomatic gastrocnemius muscles. Elevated levels of calcitonin gene-related peptide (CGRP), substance P (SP), norepinephrine, TNF- $\alpha$ , IL-1, IL-6 and low pH were reported in fluid from all sampled regions of symptomatic patients. However, elevated levels were also found in uninvolved, control muscle areas.

These reported alterations in biochemical milieu are consistent with inflammation due either to tissue damage or to altered peripheral nerve function, in contrast to pathology necessarily being in the tissue sampled [40, 41].

### EMG studies

In one study, EMG examination of TrPs failed to provide evidence of ongoing denervation or focal muscle spasm [42]. But another study did report spontaneous electrical activity (i.e. endplate noise and spikes) in regions considered to be TrPs in patients with chronic tension headache and pericranial muscle tenderness [43].

Simons *et al.* [44] addressed the question of whether endplate noise and spikes arise from normal endplates by performing EMG on 25 patients who met the ACR 1990 criteria for FM and 8 pain-free subjects in whom latent TrPs had been identified by manual palpation of taut bands and characteristic referral of pain [*sic*] [45, 46]. Unfortunately, the researchers conflated the TrPs of MPS and the tender points of FM, another issue yet to be resolved [47]. They concluded that endplate noise is characteristic of but not restricted to TrPs, and that the finding could not be considered a reliable diagnostic criterion [45, 46].

An alternative interpretation of these EMG findings is that insertional and spontaneous activity (i.e. endplate noise) from single muscle fibres generated by the activation of i.m. nerve termini irritated by the needle was being recorded [48]. Nonetheless, it is still asserted that spontaneous electrical activity is one of the characteristics of myofascial TrPs [49].

### Imaging studies

Seven patients with a 3-year history of myofascial pain associated with the presence of a taut band in the upper trapezius muscle were examined using magnetic resonance elastography [50]. A signature chevron-like pattern was reported, with its leading edge coincident with the physician-identified taut band. The authors did not offer diagnostic criteria nor make any comment on the relationship of a taut band to a TrP. A subsequent study of eight subjects, four of whom were said to have MPS and four of whom did not, is open to the same criticism [51].

Attempts were made to visualize TrPs using diagnostic US of the anterior abdominal wall of 10 patients [52]. The points in question appeared as a mixed echogenic area in the rectus abdominis muscle that became prominent on injection of local anaesthetic solution [52]. They conceded that the findings could have been coincidental. Also, the image presented is consistent with the normal sonographic appearance of abdominal muscles [53].

In another study, 44 patients with acute cervical pain and at least one putative TrP identified by palpation in the upper trapezius were evaluated using sonoelastography and Doppler imaging [54]. The authors claimed to have measured TrP size and to have distinguished normal muscle from active and latent TrPs. Although the data on which these assertions were made were not presented, the authors found no correlation between claimed TrP area and pain pressure threshold. The absence of pain-free control subjects is yet another flaw. These methodological concerns do not lend credibility to the findings.

### Animal models

Animal models are often informative about pathophysiology in ways that are impossible to demonstrate in humans. To be considered relevant, models must have symptomatic and/or pathological similarities to the condition being studied. For TrP research, no such model exists.

Simons and Stolov [55] biopsied ostensibly normal canine muscles, seeking to correlate palpated taut bands with morphological and histological changes. The findings were negative, given that there was no indication of pain or a pathological condition present prior to these studies. The researchers observed 'rubbing palpation produced a transient contraction which could be primarily responsible for the sensation of a hardness palpated in the dog muscles' [55]. This is the myotatic reflex, which correlates with the twitch response also evocable on palpation of normal human muscle [56].

Based upon the conjecture that '... latent TrPs can be identified in almost all skeletal muscles of normal adults' [14], a rabbit model of TrPs was proposed [57, 58]. Rabbit leg muscles were palpated until they exhibited a myotatic reflex. Such muscles were considered to contain taut bands and, by assumption, TrPs. A number of papers have since been published using this model [58–65], but have not offered evidence of clinical relevance.

### Delayed onset muscle soreness

Studies of delayed onset muscle soreness (DOMS) have been undertaken using eccentric exercise to cause symptoms, in both humans and animals. Although DOMS has been related to TrPs in only one study [66], this model was proposed for MPS [67]. The relevant experiment was performed in humans and used eccentric exercise of the extensor digitorum of the middle finger [66]. Following the development of DOMS, the muscle was palpated, revealing a tender band judged to be taut. However, since the muscle itself is a band, relating the description to TrPs seems meaningless. It should be noted that DOMS is

self-limiting, whereas whatever phenomenon is occurring with chronic muscle-related pain is not. The relevance of DOMS to TrPs remains unclear.

### Integrated hypothesis

Dommerholt *et al.* [68, 69] postulated that low-level isometric muscle contraction or eccentric or submaximal concentric contractions could result in muscle dysfunction or damage, and that the formation of TrPs would follow. According to Gerwin *et al.* [70], excessive release of acetylcholine from dysfunctional neuromuscular endplates might be responsible for the taut band phenomenon (i.e. focal muscle contraction modulated by muscle spindle afferents) and that these bands could in turn produce muscle ischaemia, apparently by compressing adjacent capillaries supplying the muscle. This physiological process could precipitate an energy crisis in the relevant working muscle, which would respond by releasing pro-inflammatory molecules, thereby activating nociceptive neurons. Although there is no experimental evidence in support of this hypothesis, others [71, 72] have accepted the motor endplate and the energy crisis theories of tonic muscle hyperactivity and TrP formation.

Recent studies of induced muscle pain in humans has not provided evidence for a reflex increase in fusimotor drive and spindle discharge [73, 74]. In fact, persistent musculoskeletal pain is associated with decreased agonist muscle tone [75]; in other words, digital pressure or other stimuli that evoke pain will decrease the tone of the muscle stimulated. The validity of the paradigm that correlates endplate activity or noise with pain arising from the TrP became further suspect when it was reported that injection of botulinum toxin A in the region of a TrP had no effect on pain intensity or mechanical pain thresholds, but did significantly reduce motor endplate activity and the EMG interference pattern [76]. Finally, the vicious circle hypothesis has now been laid to rest by microneurographic recordings in humans performed during sustained muscle pain [73, 74]. The integrated hypothesis remains conjecture in the face of conflicting data.

### Treatment

Non-invasive interventions that have been advocated include compression of the TrP, spray and stretch, transcutaneous electrical stimulation and, more recently, high-intensity focused US [77]. Invasive treatments have included injection of local anaesthetic agents, injection of CSs, injection of botulinum toxin, needle acupuncture and dry needling [78].

In their systematic review, Cummings and White [79] were unable to find evidence that needling therapies have any specific effect. Their later review of 1517 studies found only seven that were of high enough quality for meaningful analysis [80]. Rickards [81] also found limited strength of evidence for any treatment of TrPs.

Another review remarked upon the heterogeneity of the populations being treated, and the lack of widely accepted standard diagnostic criteria for MPS [82].

This review also concluded that there was insufficient evidence to support the use of most interventions.

A systematic review of botulinum toxin A for TrP treatment located 21 randomized controlled trials, with 12 eligible for consideration but only five suitable for inclusion, and concluded that the current evidence does not support any therapeutic value [83]. Again, these authors reported that the data were limited and that the patient populations were heterogeneous.

These studies provide little evidence that dry needling of TrPs is associated with a treatment effect compared with standard care [3]. They are based on small sample sizes, uncertainty as to whether TrPs were the sole cause of pain, as well as neglect of technical issues such as the variability in the location of TrPs and the depth of needle insertion.

With these results in mind, why do many clinicians insist that their treatments work? One explanation is that the treatments are rarely performed in an isolated fashion; that is, treatment is accompanied by manual therapy, home exercises and stretching.

Contextual effects could explain the plethora of anecdotal responses to treatment [84, 85]. This is not unexpected when a medical treatment with high face validity is based solely on practical experience rather than reflecting a rational approach based on pathogenesis. Apparent effectiveness of any treatment may be attributed to the natural history of the particular problem being treated, regression to the mean, and the expectation of something being done to the area in question. This can lead to the fallacy known as *post hoc ergo propter hoc* (after this, therefore because of this), when the treatment offered in fact had nothing to do with the pathogenesis of the condition towards which it was directed. A recent study comparing dry needling with manual compression, in which there was no control group, exemplifies this critical methodological issue [86].

One common factor shared by most therapies is that they elicit pain at the site of their application; that is, they are noxious stimuli. If they do work, this similarity suggests a common mechanism of action. One possible mechanism is counterirritation, or application of a competing noxious stimulus [87, 88]. It is not surprising that a noxious stimulus applied in the region where pain is experienced, whether or not there is local pathology present at that site, would elicit a transient reduction in pain intensity by recruiting those higher order brain regions responsible for anti-nociception [89, 90]. In conclusion, the vast majority of studies and meta-analyses do not support the prediction from MPS theory that focal treatment of TrPs is effective.

### An impasse

In 1976, Simons hoped that: 'It would now appear possible to resolve much of the conflicting data of the past by carefully distinguishing trigger from reference zones, and acute from chronic lesions using modern electrodiagnostic, biochemical, histochemical, and ultramicroscopic techniques' [1]. Some three decades later, he conceded



that acceptance of the concept of TrPs had been hampered by two outstanding considerations: the lack of a diagnostic gold standard and the lack of generally recognized pathogenesis [91].

We propose that sufficient research has been performed to allow TrP theories to be discarded. The scientific literature shows not only that diagnosis of the pathognomonic feature of MPS (the TrP) is unreliable, but also that treatment directed to the putative TrP elicits a response that is indistinguishable from the placebo effect. As these conclusions refute MPS, formulating a plausible scientific explanation for pain perceived by patients as coming from their muscles remains a challenge.

## Towards explaining the clinical phenomena

In our opinion, current neuroscientific hypotheses can form the basis for collaborative scientific investigation to explain the clinical phenomena. We offer two for consideration, neither of which relies on local pathophysiology.

### Neuritis model

Nerve inflammation as a source of pain was discussed in the 19th century [92–97], but focused research on nerve inflammation as a primary disease aetiology has been limited.

Quintner and Cohen [25] hypothesized that the TrP was an area of what was then called secondary hyperalgesia occurring in muscles that are structurally and physiologically unimpaired. Noting the remarkable proximity of TrPs to known peripheral nerves, these authors argued that sensitization of the axons within the nerves, possibly by inflammation, may inform the underlying mechanism. Subsequent research has emerged in support of this hypothesis.

Focal inflammation of peripheral nerves leads to ectopic axonal mechanical sensitivity and spontaneous discharge of some but not all of the nociceptors within the inflamed nerve [98–101]. These changes can be expected to lead to focal areas of neurogenic inflammation and possibly to sensitization in the muscle innervated. If confirmed, they can inform further investigation that might be highly relevant to explaining the phenomenon of chronic muscle pain.

### Referred pain and tenderness (allodynia)

Kellgren [102–104] reported the critical observation that, in addition to referred pain, referred tenderness could be induced by targeted injections of hypertonic saline into tissues such as interspinous ligaments, periosteum, cancellous bone, or voluntary muscle. His studies and those of others [105, 106] showed that nociception in deep tissues can induce the phenomena of remote localized pain and tenderness. This relegates the TrP to being a site of secondary allodynia reflecting altered central nociceptive mechanisms [107].

## Conclusion

The construct of MPS caused by TrPs remains conjecture. All working hypotheses derived from this conjecture have been refuted and therefore the theory can be discarded. In contrast, evolving insights into the neurobiology of nociception and pain suggest plausible hypotheses that form a basis for advancing knowledge and therapeutics in this challenging area.

*Disclosure statement:* The authors have declared no conflicts of interest.

## References

- 1 Simons DG. Muscle pain syndromes—Part II. *Am J Phys Med* 1976;55:15–42.
- 2 Simons DG. Muscle pain syndromes—Part I. *Am J Phys Med* 1975;54:289–311.
- 3 Dunning J, Butts R, Mourad F *et al.* Dry needling: a literature review with implications for clinical practice guidelines. *Phys Ther Rev* 2104;19:252–65.
- 4 Gowers WR. A lecture on lumbago: its lessons and analogues. *Br Med J* 1904;i:117–21.
- 5 Travell J, Rinzler SH. The myofascial genesis of pain. *Postgrad Med* 1952;11:425–34.
- 6 Stockman. A discussion on fibrositis. *Proc R Soc Med* 1913;6:36–9.
- 7 Stockman R. *Rheumatism and arthritis*. Edinburgh: W. Green 1920.
- 8 Copeman WS. A clinical contribution to the study of the aetiology of the fibrositic nodule. *Ann Rheum Dis* 1943;3:222–6.
- 9 Copeman WS, Ellman P, Kersley GD. Aetiology of chronic rheumatism. *Br Med J* 1947;1:347.
- 10 Livingstone WK. Post-traumatic pain syndromes: an interpretation of the underlying pathological pathophysiology. *Western J Obstetrics Gynaecol* 1938;46:426–34.
- 11 Bonica JJ. Management of myofascial pain syndromes in general practice. *J Am Med Assoc* 1957;164:732–8.
- 12 Elliott FA. Aspects of “fibrositis”. *Ann Rheum Dis* 1944;4:22–5.
- 13 Johansson H, Sojka P. Pathophysiological mechanisms involved in genesis and spread of muscular tension in occupational muscle pain and in chronic musculoskeletal pain syndromes: a hypothesis. *Med Hypotheses* 1991;35:196–203.
- 14 Travell JG, Simons DG. *Myofascial pain and dysfunction: the trigger point manual*. Baltimore: Williams and Wilkins, 1983.
- 15 Lewit K. The needle effect in the relief of myofascial pain. *Pain* 1979;6:83–90.
- 16 Dommerholt J. Dry needling – peripheral and central considerations. *J Man Manip Ther* 2011;19:223–7.
- 17 Giamberardino MA, Affaitati G, Fabrizio A *et al.* Effects of treatment of myofascial trigger points on the pain of fibromyalgia. *Curr Pain Headache Rep* 2011;15:393–9.

- 18 Ge HY. Prevalence of myofascial trigger points in fibromyalgia: the overlap of two common problems. *Curr Pain Headache Rep* 2010;14:339–45.
- 19 Staud R, Nagel S, Robinson ME *et al.* Enhanced central pain processing of fibromyalgia patients is maintained by muscle afferent input: a randomized, double-blind, placebo-controlled study. *Pain* 2009;145:96–104.
- 20 Alonso-Blanco C, Fernandez-de-las-Penas C, Morales-Cabezas M *et al.* Multiple active myofascial trigger points reproduce the overall spontaneous pain pattern in women with fibromyalgia and are related to widespread mechanical hypersensitivity. *Clin J Pain* 2011;27:405–13.
- 21 Wang C, Ge HY, Ibarra JM *et al.* Spatial pain propagation over time following painful glutamate activation of latent myofascial trigger points in humans. *J Pain* 2012;13:537–45.
- 22 Gerwin RD. A review of myofascial pain and fibromyalgia—factors that promote their persistence. *Acupunct Med* 2005;23:121–34.
- 23 Granges G, Littlejohn G. Prevalence of myofascial pain syndrome in fibromyalgia syndrome and regional pain syndrome: a comparative study. *J Musculoskel Pain* 1993;1:19–35.
- 24 Mense S, Simons DG, Russell IJ. *Muscle pain: understanding its nature, diagnosis and treatment.* Philadelphia: Lippincott, Williams & Wilkins, 2001.
- 25 Quintner JL, Cohen ML. Referred pain of peripheral nerve origin: an alternative to the “myofascial pain” construct. *Clin J Pain* 1994;10:243–51.
- 26 Tough EA, White AR, Richards S *et al.* Variability of criteria used to diagnose myofascial trigger point pain syndrome—evidence from a review of the literature. *Clin J Pain* 2007;23:278–86.
- 27 Lucas N, Macaskill P, Irwig L *et al.* Reliability of physical examination for diagnosis of myofascial trigger points: a systematic review of the literature. *Clin J Pain* 2009;25:80–9.
- 28 Bron C, Franssen J, Wensing M *et al.* Interrater reliability of palpation of myofascial trigger points in three shoulder muscles. *J Man Manip Ther* 2007;15:203–15.
- 29 Sciotti VM, Mittak VL, DiMarco L *et al.* Clinical precision of myofascial trigger point location in the trapezius muscle. *Pain* 2001;93:259–66.
- 30 Myburgh C, Lauridsen HH, Larsen AH *et al.* Standardized manual palpation of myofascial trigger points in relation to neck/shoulder pain: the influence of clinical experience on inter-examiner reproducibility. *Man Ther* 2011;16:136–40.
- 31 Al-Shenqiti AM, Oldham JA. Test-retest reliability of myofascial trigger point detection in patients with rotator cuff tendonitis. *Clin Rehabil* 2005;19:482–7.
- 32 Wolfe F, Simons DG, Friction J *et al.* The fibromyalgia and myofascial pain syndromes: a preliminary study of tender points and trigger points in persons with fibromyalgia, myofascial pain syndrome and no disease. *J Rheumatol* 1992;19:944–51.
- 33 Hsieh CY, Hong CZ, Adams AH *et al.* Interexaminer reliability of the palpation of trigger points in the trunk and lower limb muscles. *Arch Phys Med Rehabil* 2000;81:258–64.
- 34 Lew PC, Lewis J, Story I. Inter-therapist reliability in locating latent myofascial trigger points using palpation. *Man Ther* 1997;2:87–90.
- 35 Myburgh C, Larsen AH, Hartvigsen J. A systematic, critical review of manual palpation for identifying myofascial trigger points: evidence and clinical significance. *Arch Phys Med Rehabil* 2008;89:1169–76.
- 36 Brendstrup P, Jespersen K, Asboe H. Morphological and chemical connective tissue changes in fibrositic muscles. *Ann Rheum Dis* 1957;16:438–40.
- 37 Windisch A, Reitingner A, Traxler H *et al.* Morphology and histochemistry of myogelosis. *Clin Anat* 1999;12:266–71.
- 38 Shah JP, Phillips TM, Danoff JV *et al.* An *in vivo* micro-analytical technique for measuring the local biochemical milieu of human skeletal muscle. *J Appl Physiol* 2005;99:1977–84.
- 39 Shah J, Danoff J, Desai M *et al.* Biochemicals associated with pain and inflammation are elevated in sites near to and remote from active myofascial trigger points. *Arch Phys Med Rehabil* 2008;89:16–23.
- 40 Mense S. Algesic agents exciting muscle nociceptors. *Exp Brain Res* 2009;196:89–100.
- 41 Chiu IM, von Hehn CA, Woolf CJ. Neurogenic inflammation and the peripheral nervous system in host defense and immunopathology. *Nat Neurosci* 2012;15:1063–67.
- 42 Durette MR, Rodriguez AA, Agre JC *et al.* Needle electromyographic evaluation of patients with myofascial or fibromyalgic pain. *Am J Phys Med Rehabil* 1991;70:154–6.
- 43 Hubbard DR, Berkoff GM. Myofascial trigger points show spontaneous needle EMG activity. *Spine* 1993;18:1803–7.
- 44 Wolfe F, Smythe HA, Yunus MB *et al.* The American College of Rheumatology 1990 criteria for the classification of fibromyalgia. Report of the Multicenter Criteria Committee. *Arthritis Rheum* 1990;33:160–72.
- 45 Simons DG. Do endplate noise and spikes arise from normal motor endplates? *Am J Phys Med Rehabil* 2001;80:134–40.
- 46 Simons DG, Hong CZ, Simons LS. Endplate potentials are common to midfiber myofascial trigger points. *Am J Phys Med Rehabil* 2002;81:212–22.
- 47 Bennett RM, Goldenberg DL. Fibromyalgia, myofascial pain, tender points and trigger points: splitting or lumping? *Arthritis Res Ther* 2011;13:117.
- 48 Katirji B. Clinical electromyography. In: Bradley WG, Daroff RB, Fenichel GM, Jankovic J, eds. *Neurology in clinical practice.* Philadelphia: Butterworth Heinemann, 2004:491–520.
- 49 Ge HY, Fernandez-de-Las-Penas C, Yue SW. Myofascial trigger points: spontaneous electrical activity and its consequences for pain induction and propagation. *Chin Med* 2011;6:13.
- 50 Chen Q, Bensamoun S, Basford J *et al.* Identification and quantification of myofascial taut bands with magnetic resonance elastography. *Arch Phys Med Rehabil* 2007;88:1658–61.
- 51 Chen Q, Basford J, An KN. Ability of magnetic resonance elastography to assess taut bands. *Clin Biomech* 2008;23:623–9.

- 52 Niraj G, Collett BJ, Bone M. Ultrasound-guided trigger point injection: first description of changes visible on ultrasound scanning in the muscle containing the trigger point. *Br J Anaesth* 2011;107:474–5.
- 53 Gokhale S. Sonography in identification of abdominal wall lesions presenting as palpable masses. *J Ultrasound Med* 2006;25:1199–209.
- 54 Ballyns JJ, Shah JP, Hammond J *et al.* Objective sonographic measures for characterizing myofascial trigger points associated with cervical pain. *J Ultrasound Med* 2011;30:1331–40.
- 55 Simons DG, Stolov WC. Microscopic features and transient contraction of palpable bands in canine muscle. *Am J Phys Med* 1976;55:65–88.
- 56 Castro AJ, Merchut MP, Neafsey EJ *et al.* Neuroscience: an outline approach. Missouri: Mosby Inc., 2002:111–26.
- 57 Hong CZ, Torigoe Y. Electrophysiological characteristics of localized twitch responses in responsive taut bands of rabbit skeletal muscle fibers. *J Musculoskel Pain* 1994;2:17–43.
- 58 Chen KH, Hong CZ, Kuo FC *et al.* Electrophysiologic effects of a therapeutic laser on myofascial trigger spots of rabbit skeletal muscles. *Am J Phys Med Rehabil* 2008;87:1006–14.
- 59 Hong CZ, Torigoe Y, Yu J. The localized twitch responses in responsive taut bands of rabbit skeletal muscle fibres are related to the reflexes at spinal cord level. *J Musculoskel Pain* 1995;3:15–33.
- 60 Simons DG, Hong CZ, Simons LS. Prevalence of spontaneous electrical activity at trigger spots and at control sites in rabbit skeletal muscle. *J Musculoskel Pain* 1995;3:35–48.
- 61 Chen JT, Chen SM, Kuan TS *et al.* Phentolamine effect on the spontaneous electrical activity of active loci in a myofascial trigger spot of rabbit skeletal muscle. *Arch Phys Med Rehabil* 1998;79:790–4.
- 62 Chen JT, Chung KC, Hou CR *et al.* Inhibitory effect of dry needling on the spontaneous electrical activity recorded from myofascial trigger spots of rabbit skeletal muscle. *Am J Phys Med Rehabil* 2001;80:729–35.
- 63 Kuan TS, Chen JT, Chen SM *et al.* Effect of botulinum toxin on endplate noise in myofascial trigger spots of rabbit skeletal muscle. *Am J Phys Med Rehabil* 2002;81:512–20.
- 64 Hsieh YL, Chou LW, Joe YS *et al.* Spinal cord mechanism involving the remote effects of dry needling on the irritability of myofascial trigger spots in rabbit skeletal muscle. *Arch Phys Med Rehabil* 2011;92:1098–105.
- 65 Fu Z, Hsieh YL, Hong CZ *et al.* Remote subcutaneous needling to suppress the irritability of myofascial trigger spots: an experimental study in rabbits. *Evid Based Complement Alternat Med* 2012;2012:353916.
- 66 Itoh K, Okada K, Kawakita K. A proposed experimental model of myofascial trigger points in human muscle after slow eccentric exercise. *Acupunct Med* 2004;22:2–12.
- 67 Hayashi K, Ozaki N, Kawakita K *et al.* Involvement of NGF in the rat model of persistent muscle pain associated with taut band. *J Pain* 2011;12:1059–68.
- 68 Bron C, Dommerholt JD. Etiology of myofascial trigger points. *Curr Pain Headache Rep* 2012;16:439–44.
- 69 Dommerholt J, Bron C, Franssen J. Myofascial trigger points: an evidence-informed review. *J Man Manip Ther* 2006;14:203–21.
- 70 Gerwin RD, Dommerholt J, Shah JP. An expansion of Simons' integrated hypothesis of trigger point formation. *Curr Pain Headache Rep* 2004;8:468–75.
- 71 Giamberardino MA, Affaitati G, Fabrizio A *et al.* Myofascial pain syndromes and their evaluation. *Best Pract Res Clin Rheumatol* 2011;25:185–98.
- 72 Niddam DM, Chan RC, Lee SH *et al.* Central representation of hyperalgesia from myofascial trigger point. *Neuroimage* 2008;39:1299–306.
- 73 Birznieks I, Burton AR, Macefield VG. The effects of experimental muscle and skin pain on the static stretch sensitivity of human muscle spindles in relaxed leg muscles. *J Physiol* 2008;586:2713–23.
- 74 Fazalbhoy A, Macefield VG, Birznieks I. Tonic muscle pain does not increase fusimotor drive to human leg muscles: implications for chronic muscle pain. *Exp Physiol* 2013;98:1125–32.
- 75 Lund JP, Donga R, Widmer CG *et al.* The pain adaptation model: a discussion of the relationship between chronic musculoskeletal pain and motor activity. *Can J Physiol Pharmacol* 1991;69:683–94.
- 76 Qerama E, Fuglsang-Frederiksen A, Kasch H *et al.* A double-blind, controlled study of botulinum toxin A in chronic myofascial pain. *Neurology* 2006;67:241–5.
- 77 Unalan H, Majlesi J, Aydin FY *et al.* Comparison of high-power pain threshold ultrasound therapy with local injection in the treatment of active myofascial trigger points of the upper trapezius muscle. *Arch Phys Med Rehabil* 2011;92:657–62.
- 78 Lavelle ED, Lavelle W, Smith HS. Myofascial trigger points. *Anesthesiol Clin* 2007;25:841–51.
- 79 Cummings TM, White AR. Needling therapies in the management of myofascial trigger point pain: a systematic review. *Arch Phys Med Rehabil* 2001;82:986–92.
- 80 Tough EA, White AR, Cummings TM *et al.* Acupuncture and dry needling in the management of myofascial trigger point pain: a systematic review and meta-analysis of randomised controlled trials. *Eur J Pain* 2009;13:3–10.
- 81 Rickards LD. The effectiveness of non-invasive treatments for active myofascial trigger point pain: a systematic review of the literature. *Int J Osteopathic Med* 2006;9:120–36.
- 82 Annaswamy TM, De Luigi AJ, O'Neill BJ *et al.* Emerging concepts in the treatment of myofascial pain: a review of medications, modalities, and needle-based interventions. *PM R* 2011;3:940–61.
- 83 Ho KY, Tan KH. Botulinum toxin A for myofascial trigger point injection: a qualitative systematic review. *Eur J Pain* 2007;11:519–27.
- 84 Hartman SE. Why do ineffective treatments seem helpful? A brief review. *Chiropr Osteopat* 2009;17:10.
- 85 Cohen ML. Placebo theory. In: Hutson M, Ward A, eds. *Oxford Textbook of Musculoskeletal Medicine*. 2nd edn. Oxford University Press, 2014, in press.

- 86 Ziaefar M, Arab AM, Karimi N *et al.* The effect of dry needling on pain, pressure pain threshold and disability in patients with a myofascial trigger point in the upper trapezius muscle. *J Bodyw Mov Ther* 2013;18: 298–305.
- 87 Piche M, Arsenault M, Rainville P. Cerebral and cerebrospinal processes underlying counterirritation analgesia. *J Neurosci* 2009;29:14236–46.
- 88 Goffaux P, Redmond WJ, Rainville P *et al.* Descending analgesia—when the spine echoes what the brain expects. *Pain* 2007;130:137–43.
- 89 Willer JC, Bouhassira D, Le Bars D. Neurophysiological bases of the counterirritation phenomenon: diffuse control inhibitors induced by nociceptive stimulation. *Neurophysiol Clin* 1999;29:379–400.
- 90 Sprenger C, Bingel U, Buchel C. Treating pain with pain: supraspinal mechanisms of endogenous analgesia elicited by heterotopic noxious conditioning stimulation. *Pain* 2011;152:428–39.
- 91 Simons DG. Review of enigmatic MTRPs as a common cause of enigmatic musculoskeletal pain and dysfunction. *J Electromyogr Kinesiol* 2004;14: 95–107.
- 92 Player RP. On irritation of the spinal nerves. *Quart J Sci* 1821;12:428.
- 93 Brown T. On irritation of the spinal nerves. *Glasgow Med J* 1828;1:131–60.
- 94 Teale TP. A treatise on neuralgic diseases: dependent upon irritation of the spinal marrow and ganglia of the sympathetic nerve. Woodstock: Nahum Haskell, 1834.
- 95 Mitchell SW. Injuries of nerves and their consequences. Philadelphia: J.B. Lippincott and Company, 1872.
- 96 Gowers WR. A manual of diseases of the nervous system. Philadelphia: P. Blakiston, Son & Co., 1896.
- 97 Nothnagel H. Neuritis in relation to its diagnosis and pathology. In: Volkmann R, ed. Clinical lectures on subjects concerned with medicine, surgery, and obstetrics. London: The New Sydenham Society, 1877, 210–36.
- 98 Bove GM, Ransil BJ, Lin HC *et al.* Inflammation induces ectopic mechanical sensitivity in axons of nociceptors innervating deep tissues. *J Neurophysiol* 2003;90: 1949–55.
- 99 Dilley A, Lynn B, Pang SJ. Pressure and stretch mechanosensitivity of peripheral nerve fibres following local inflammation of the nerve trunk. *Pain* 2005;117: 462–72.
- 100 Dilley A, Bove GM. Resolution of inflammation-induced axonal mechanical sensitivity and conduction slowing in C-fiber nociceptors. *J Pain* 2008;9:185–92.
- 101 Bove GM. Focal nerve inflammation induces neuronal signs consistent with symptoms of early complex regional pain syndromes. *Exp Neurol* 2009;219:223–7.
- 102 Kellgren JH. On the distribution of pain arising from deep somatic structures with charts of segmental pain areas. *Clin Sci* 1938;4:35–46.
- 103 Kellgren JH. A preliminary account of referred pains arising from muscle. *Br Med J* 1938;12:325–7.
- 104 Kellgren JH. The anatomical source of back pain. *Rheumatol Rehabil* 1977;16:3–12.
- 105 Feinstein B, Langton JNK, Jameson RM *et al.* Experiments on pain referred from deep somatic tissues. *J Bone Joint Surg Am* 1954;36-A:981–97.
- 106 Arendt-Nielsen L, Svensson P. Referred muscle pain: basic and clinical findings. *Clin J Pain* 2001;17: 11–9.
- 107 Latremoliere A, Woolf CJ. Central sensitization: a generator of pain hypersensitivity by central neural plasticity. *J Pain* 2009;10:895–926.
